# Supplementary material for: Comparative Analysis of Clinical and Genomic Characteristics of Hypervirulent Klebsiella pneumoniae from Hospital and Community Settings: Experience from a Tertiary Healthcare Center in India
Source: PubMed Central journal article supplement (PMC9602566; doi:10.1128/spectrum.00376-22), 2022-08-31
Supplement: spectrum.00376-22-s0001.pdf [file spectrum.00376-22-s0001.pdf]

**Table S1: Genome quality statistics for all the assembled genomes**

| <b>Isolate no.</b> | <b>No. of contigs</b> | <b>Largest contig</b> | <b>Size(bp)</b> | <b>GC (%)</b> | <b>N50</b> | <b>L50</b> | <b>Genome fraction (%)</b> |
|--------------------|-----------------------|-----------------------|-----------------|---------------|------------|------------|----------------------------|
| S44                | 40                    | 517772                | 5482928         | 57.27         | 308712     | 7          | 92.224                     |
| S54                | 46                    | 1082409               | 5691332         | 57.15         | 435362     | 4          | 98.04                      |
| S55                | 79                    | 1010433               | 5752447         | 56.75         | 345690     | 6          | 92.898calc                 |
| S56                | 86                    | 992865                | 5708668         | 57.05         | 226397     | 5          | 90.508                     |
| S57                | 101                   | 605472                | 5718919         | 56.86         | 233432     | 9          | 90.207                     |
| S58                | 104                   | 584373                | 5839331         | 56.58         | 306551     | 8          | 91.983                     |
| S59                | 70                    | 698263                | 5769731         | 56.77         | 350190     | 6          | 93.125                     |
| S60                | 72                    | 851986                | 5714482         | 56.83         | 286886     | 6          | 93.1                       |
| S61                | 34                    | 512126                | 5352578         | 57.8          | 363661     | 7          | 33.733                     |
| S62                | 2947                  | 86358                 | 7457857         | 56.15         | 4818       | 346        | 92.984                     |
| S63                | 2187                  | 71415                 | 7190142         | 56.28         | 11256      | 176        | 93.917                     |
| S65                | 83                    | 698263                | 5745130         | 56.78         | 287340     | 7          | 93.105                     |
| S66                | 335                   | 357715                | 6494540         | 56.07         | 95700      | 19         | 93.42                      |
| S67                | 115                   | 504304                | 6062433         | 56.53         | 200969     | 11         | 93.098                     |

**Table S2: Sequence types of isolates based on MLST scheme**

| <b>Isolate</b> | <b>Chr_ST</b> | <b>gapA</b> | <b>infB</b> | <b>mdh</b> | <b>pgi</b> | <b>phoE</b> | <b>rpoB</b> | <b>tonB</b> |
|----------------|---------------|-------------|-------------|------------|------------|-------------|-------------|-------------|
| S44            | ST86          | 9           | 4           | 2          | 1          | 1           | 1           | 27          |
| S54            | ST23          | 2           | 1           | 1          | 1          | 9           | 4           | 12          |
| S55            | ST2096        | 1           | 6           | 1          | 1          | 1           | 46          | 1           |
| S56            | ST147         | 3           | 4           | 6          | 1          | 7           | 4           | 38          |
| S57            | ST43          | 2           | 6           | 1          | 5          | 11          | 1           | 15          |
| S58            | ST231         | 2           | 6           | 1          | 3          | 26          | 1           | 77          |
| S59            | ST2096        | 1           | 6           | 1          | 1          | 1           | 46          | 1           |
| S60            | ST2096        | 1           | 6           | 1          | 1          | 1           | 46          | 1           |
| S61            | ST3857        | 18          | 23          | 56         | 260        | 25          | 92          | 548         |
| S62            | ST147-1LV     | 3           | 4           | 6          | 1          | -           | 4           | 38          |
| S63            | ST336-1LV     | 2           | 1           | 1          | 1          | 72          | 4           | -           |
| S65            | ST2096        | 1           | 6           | 1          | 1          | 1           | 46          | 1           |
| S66            | ST15          | 1           | 1           | 1          | 1          | 1           | 1           | 1           |
| S67            | ST15-1LV      | 1           | 1           | 1          | 1          | 1*          | 1           | 1           |

**Data Availability:**

The genome sequenced files are submitted to NCBI SRA under the accession number SRR17640814, SRR17640813, SRR17640812, SRR17640811, SRR17640810, SRR17640809, SRR17640808, SRR17640807, SRR17640806, SRR17640805, SRR17640804, SRR17640803, SRR17640802, SRR17640801

**Table S3: List of highly mutated genes with their respective functions (as found in UniProt and NCBI)**

| <b>Gene Names</b> | <b>Function</b>                                                      |
|-------------------|----------------------------------------------------------------------|
| <i>KP1_0403</i>   | Putative secretion ATPase                                            |
| KP1_4102          | hypothetical protein                                                 |
| <i>fimD</i>       | Putative fimbrial usher protein                                      |
| <i>mobB</i>       | Mobilization protein, GTP binding                                    |
| <i>wzi</i>        | Surface assembly of capsule                                          |
| <i>wzc</i>        | ATP Binding and protein tyrosine kinase activity                     |
| KP1_0410          | Fimbrial biogenesis outer membrane usher protein                     |
| <i>ardC</i>       | Single-stranded DNA binding                                          |
| <i>wza</i>        | Polysaccharide transmembrane transporter activity                    |
| KP1_4970          | AsmA2 domain-containing protein YhdP                                 |
| <i>RmpA</i>       | DNA binding                                                          |
| <i>WcaJ</i>       | Transferase activity                                                 |
| <i>entA</i>       | 2,3-dihydro-2,3-dihydroxybenzoate dehydrogenase activity             |
| <i>entD</i>       | holo-[acyl-carrier-protein] synthase activity, magnesium ion binding |
| <i>entC</i>       | isochorismate synthase activity                                      |
